# Supplementary material for: Combined physical confinement and chemical adsorption on co-doped hollow TiO2 for long-term cycle lithium–sulfur batteries
Source: Royal Society of Chemistry journal article supplement (doi:10.1039/d2nr01815b), 2022-01-01
Supplement: d2nr01815b1.pdf [file d2nr01815b1.pdf]

## Supporting Information

### Combined Physical Confinement and Chemical Adsorption on Co-doping Hollow TiO<sub>2</sub> for Long-Term Cycle Lithium-sulfur Batteries

Shuaibo Zeng,<sup>\*,[a]</sup> Jing Peng,<sup>[a]</sup> Xinghua Liang,<sup>\*,[b]</sup> Xi Wu,<sup>[b]</sup> Haorong Zheng,<sup>[a]</sup> Hai Zhong,<sup>[c]</sup> Tuan Guo,<sup>[c]</sup> Shihan Luo,<sup>[a]</sup> Jingyin Hong,<sup>[a]</sup> Yongyi Li,<sup>[a]</sup> Qiang Wu,<sup>[a]</sup> and Wei Xu<sup>\*,[a]</sup>

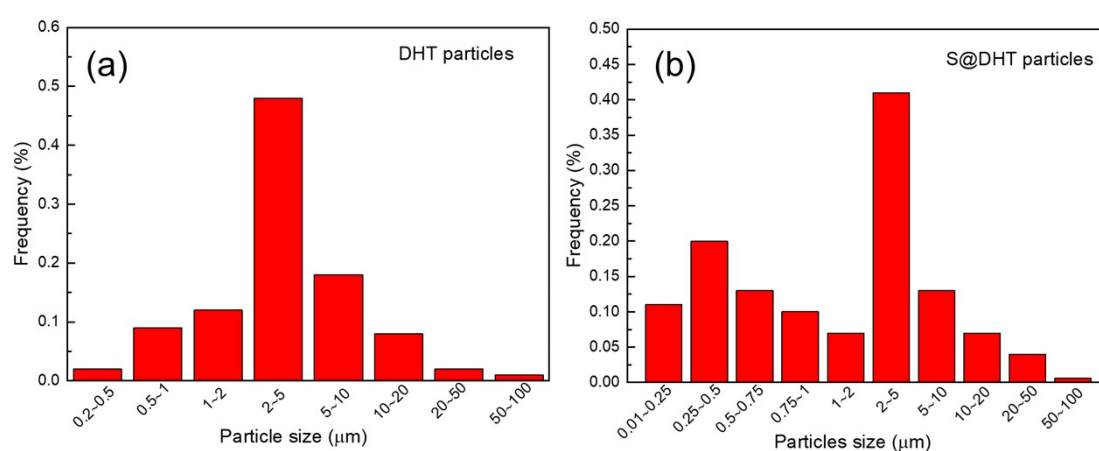

**Figure S1.** Size distribution of (a) DHT, and (b) S@DHT composite as determined by particle density analysis instrument.

**Table S1.** Specific surface area, total pore volume and pore diameter of the four samples (S@DHT, S/DHT, DHT, and elemental sulfur)

| Samples | $S_{\text{BET}}$ ( $\text{m}^2 \text{g}^{-1}$ ) | Total pore volume               |                    |
|---------|-------------------------------------------------|---------------------------------|--------------------|
|         |                                                 | ( $\text{cm}^3 \text{g}^{-1}$ ) | pore diameter (nm) |
| S@DHT   | 249.23                                          | 0.37                            | 12.28              |
| S/DHT   | 210.81                                          | 0.29                            | 13.56              |
| DHT     | 652.57                                          | 0.92                            | 5.96               |
| Sulfur  | 16.39                                           | 0.17                            | 16.23              |

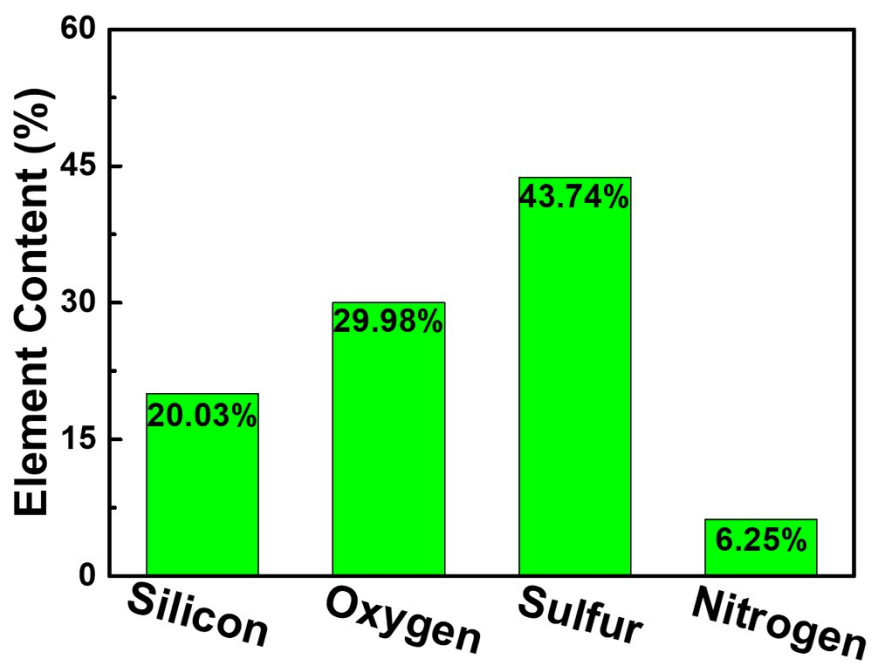

**Figure S2.** The summary of the elemental content histogram in the S@DHT sample.

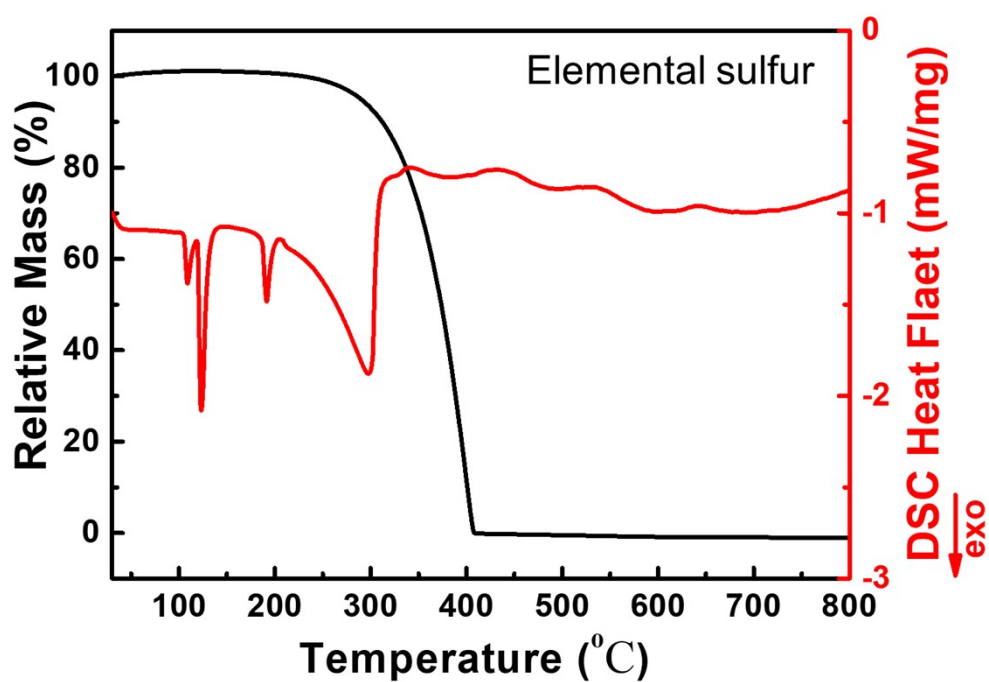

**Figure S3.** TGA/DSC curves of elemental sulfur [1].

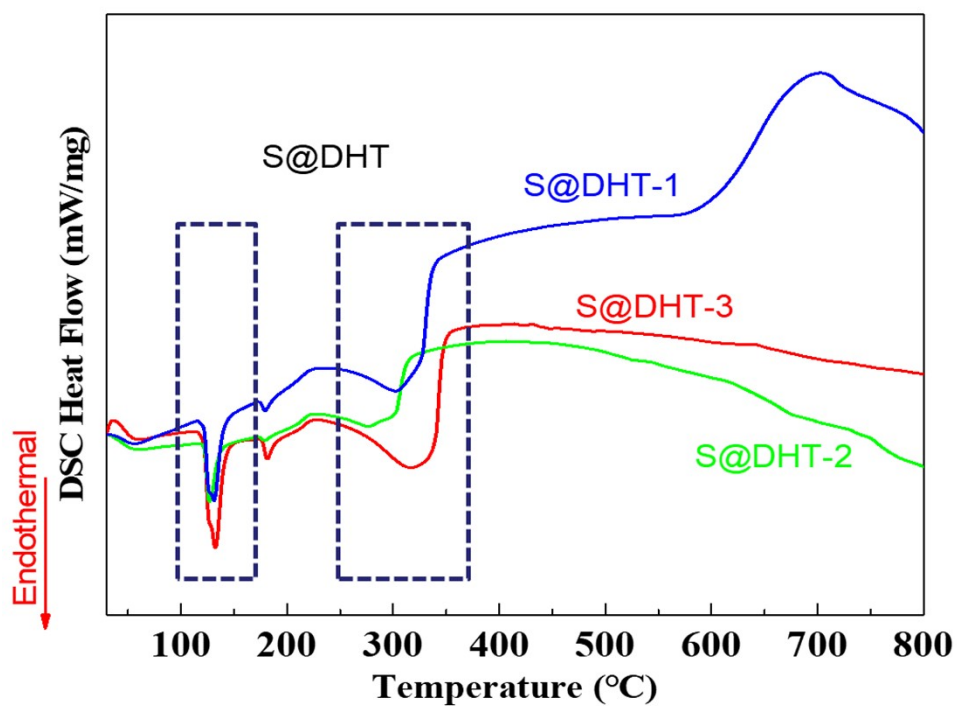

**Figure S4.** DSC curves of the three S@DHT samples.

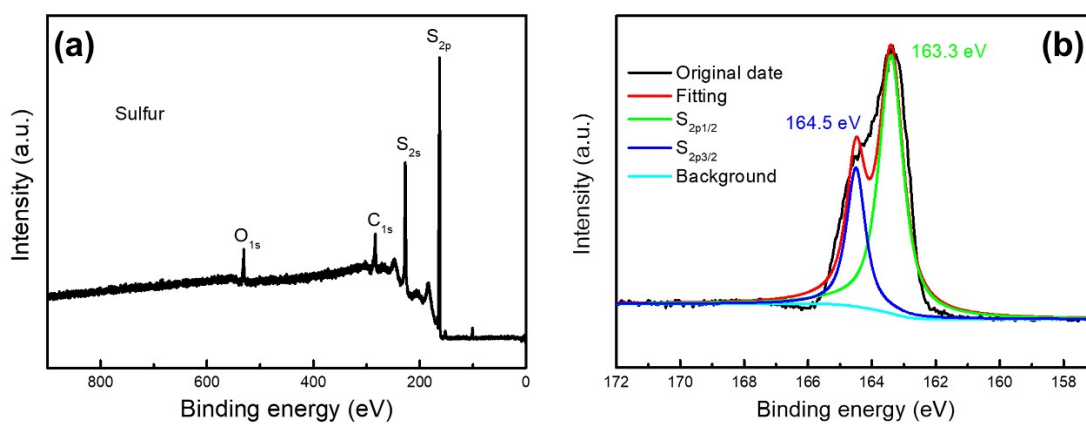

**Figure S5.** (a) XPS survey spectrum of elemental sulfur, (b) High-resolution fitting spectrum of elemental S  $2p$ .

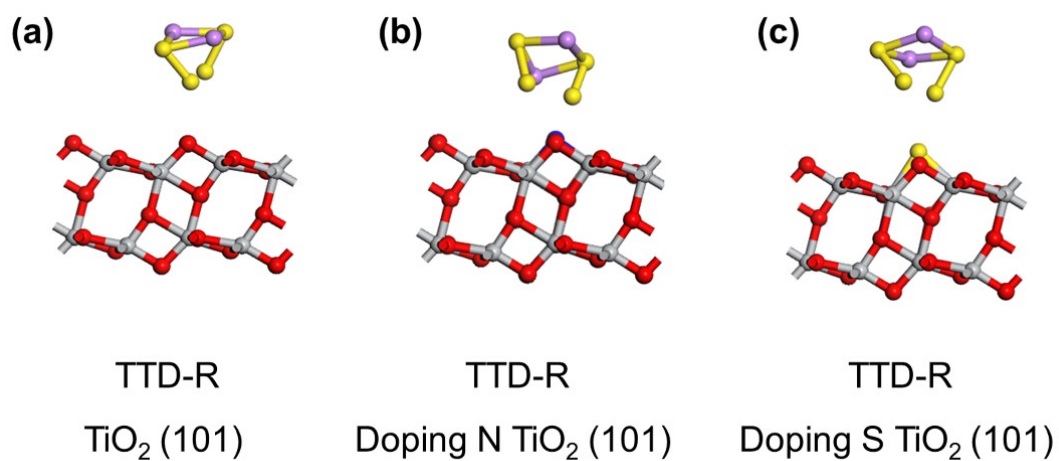

**Figure S6.** Different viewpoints optimized configurations of (a) between  $\text{TiO}_2$  and  $\text{Li}_2\text{S}_4$ , (b) between N-doped  $\text{TiO}_2$  and  $\text{Li}_2\text{S}_4$ , (c) between S-doped  $\text{TiO}_2$  and  $\text{Li}_2\text{S}_4$ .

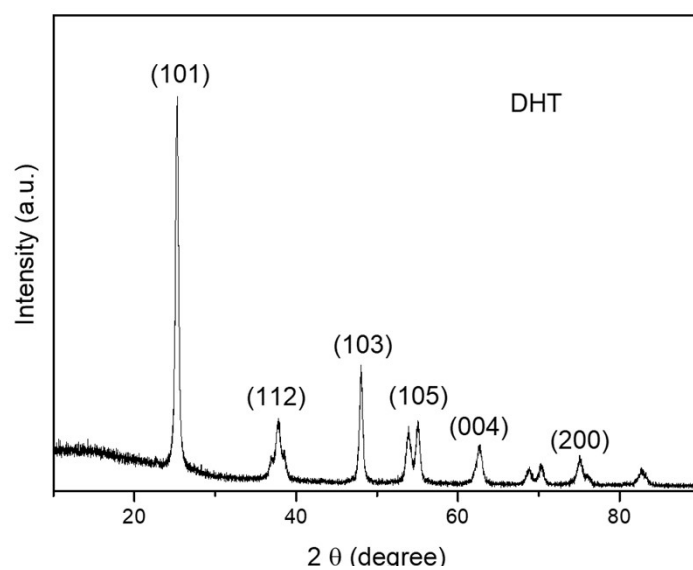

**Figure S7.** XRD pattern of DHT.

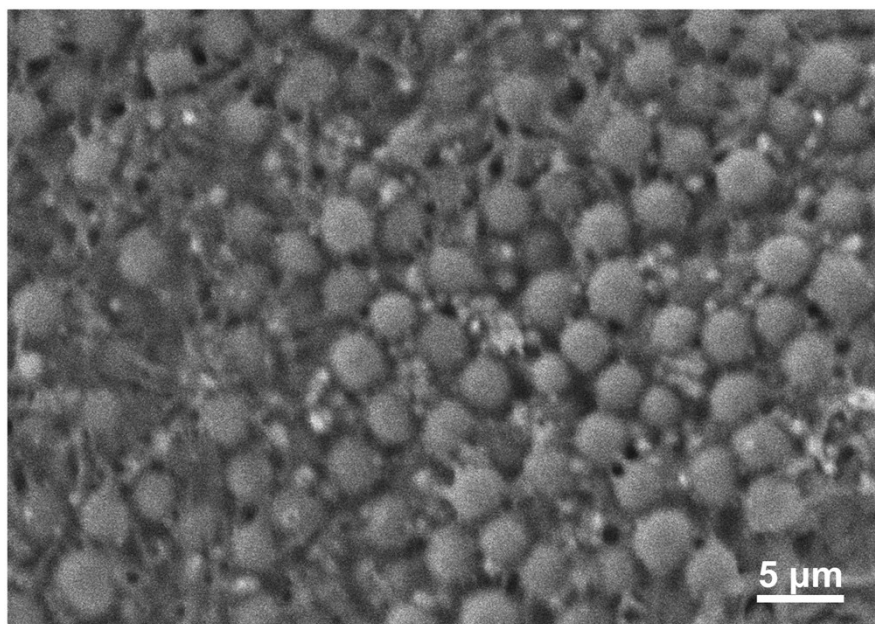

**Figure S8.** SEM image of sulfur electrode with S@DHT cathode.

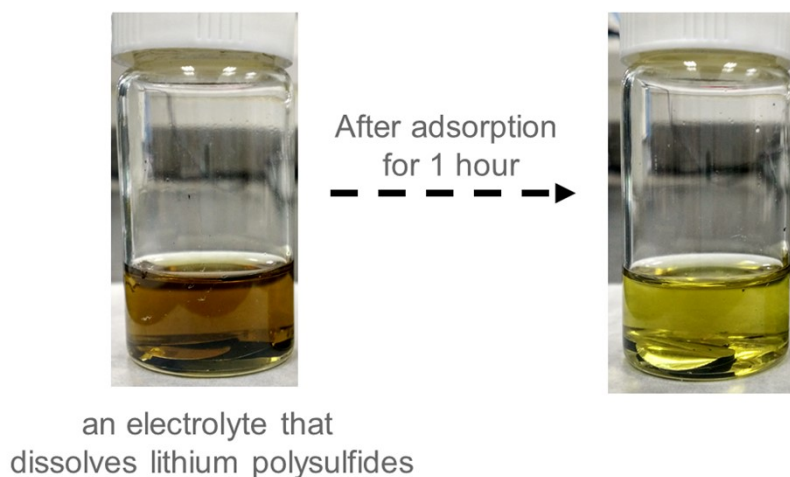

**Figure S9.** Illustration of electrodes placed in an electrolyte that dissolves lithium polysulfides. The electrolyte was configured using with 1.0 mol L<sup>-1</sup> lithium bis(trifluoromethanesulfonyl) imide (LiTFSI) with 0.1 mol L<sup>-1</sup> of LiNO<sub>3</sub> in 1,3-dioxolane and 1,2-dimethoxyethane (v/v = 1:1). Further, We prepared Li<sub>2</sub>S<sub>8</sub> which was synthesis using calculated stoichiometry of Li<sub>2</sub>S and elemental sulfur. Then the 1 mol L<sup>-1</sup> Li<sub>2</sub>S<sub>8</sub> was dissolves in above electrolyte. Finally, The prepared five electrodes are added to the final solution. All the above experimental steps are performed in a glove box filled with argon gas.

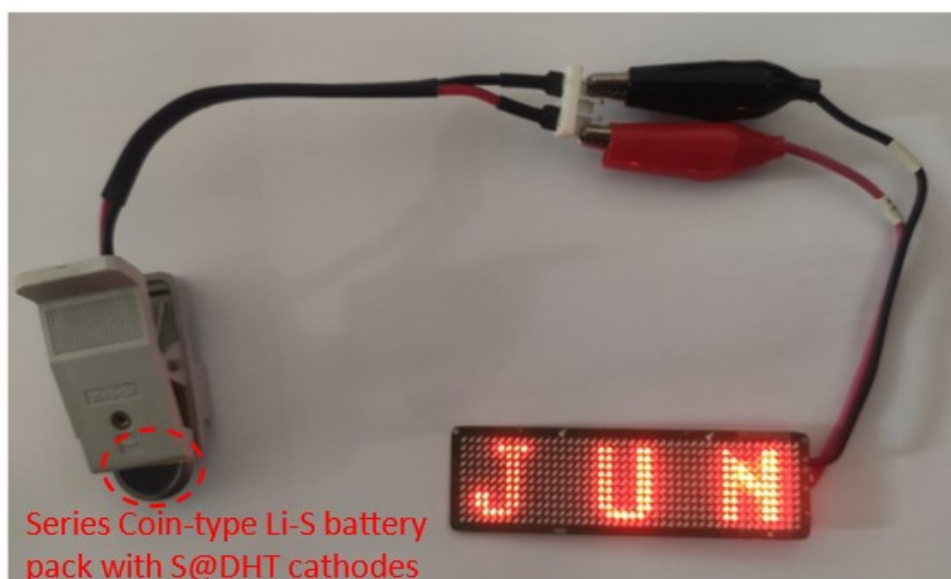

**Figure S10.** Practical demonstration of Li-S batteries with the S@DHT cathode.

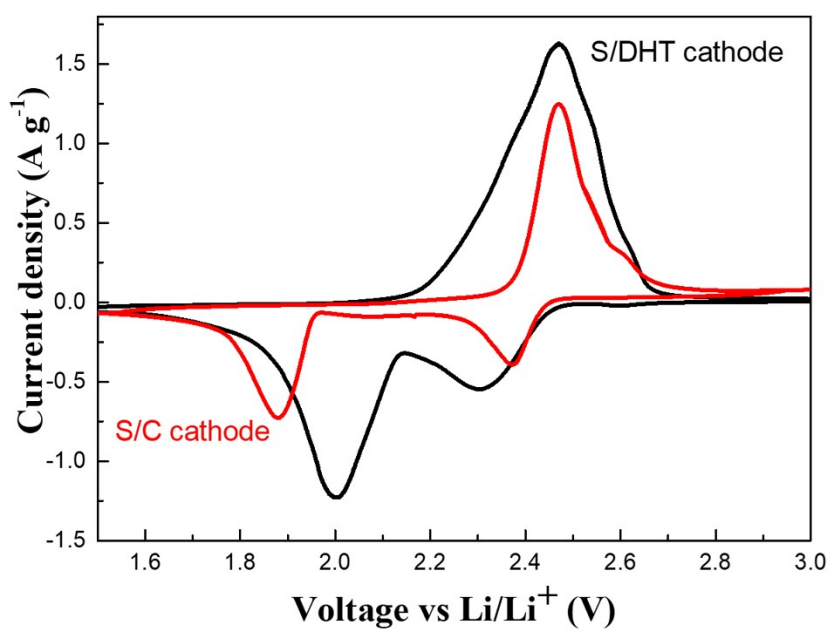

**Figure S11.** CV curves of Li-S batteries with prefabricated S/DHT, S/C cathodes at scan rate of  $0.2 \text{ mV s}^{-1}$  and in the scan voltage range of  $1.5 \sim 3.0 \text{ V vs Li/Li}^+$ .

**Table S2** (a) equivalent circuit for S@DHT, S/DHT and S/C cathodes, (b) charge-transfer resistance ( $R_{ct}$ ) of different electrodes by fitting impedance spectroscopy. The high-frequency intercept on the real axis represents the ohmic resistance ( $R_f$ ) of the cell, including the electrolyte and electrode resistances. The semicircles in the high-frequency region along with a radial oblique line in the low-frequency region correspond to the charge-transfer resistance ( $R_{ct}$ ) and the Warburg impedance ( $W_0$ ).

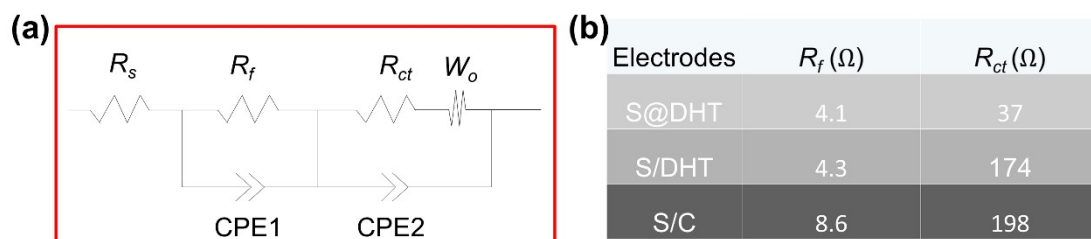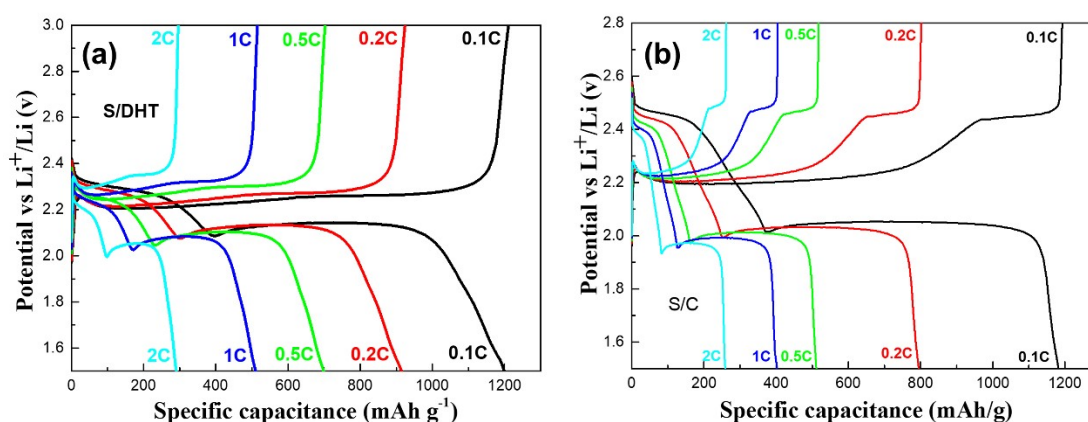

**Figure S12.** The charge and discharge of S/DHT and S/C cathodes at rate-current densities from 0.1 C to 2 C.



**Table S3.** The discharge capacity of the three electrodes (S/C, S/DHT, and S@DHT electrodes) with various current densities (0.1 C, 0.2 C, 0.5 C, 1 C, 2 C, and back to 0.1 C).

| Samples   | 0.1 C                  | 0.2 C                  | 0.5 C                  | 1 C                    | 2 C                    | Back to 0.1 C          |
|-----------|------------------------|------------------------|------------------------|------------------------|------------------------|------------------------|
| electrode | (mAh g <sup>-1</sup> ) |
| S/C       | 1189.6                 | 800.2                  | 513.7                  | 400.9                  | 260.1                  | 613.4                  |
| S/DHT     | 1198.4                 | 917.4                  | 703.2                  | 512.5                  | 296.7                  | 943.8                  |
| S@DHT     | 1258.1                 | 1086.4                 | 904.3                  | 738.6                  | 571.8                  | 1133.9                 |

**Table S4.** The electrochemical performances comparison of prepared Li-S batteries by different literatures in recent years.

| References                                   | First Discharge Capacity (mAh/g) | C-Rate Capacity (mAh/g)                                 | Total Cycle Number | Degradation Rate Per Cycle | Coulombic Efficiency | Sulphur Loading in electrode        |
|----------------------------------------------|----------------------------------|---------------------------------------------------------|--------------------|----------------------------|----------------------|-------------------------------------|
| This work                                    | 1,258 (0.1 C)                    | 1086 (0.2 C); 904 (0.5 C); 738 (1 C); 571 (2 C)         | 500                | 0.0478%                    | ~100%                | 3.8 mg/cm <sup>2</sup>              |
| Small, 2020, 1906634                         | 1,382 (0.1C)                     | 1293 (0.2 C); 1181 (0.5 C); 929 (1 C); 679 (2 C)        | 400                | 0.038%                     | --                   | 3.61 mg cm <sup>-2</sup>            |
| J. Energy Chem., 2020, 51, 262-271           | 1353 (0.1C)                      | 1110 (0.2 C); 1014 (0.5 C); 950 (1 C); 886 (2 C)        | 500                | 0.05%                      | 100%                 | 1.5 mg cm <sup>-2</sup><br>67.5 wt% |
| Angew. Chem. Int. Ed., 2021, 202114671       | 1017 (0.2 C)                     | 903 (0.5 C); 873 (1 C); 771 (2 C); 309 (3 C); 293 (4 C) | 250                | ~0.084%                    | 100%                 | 1.2 mg cm <sup>-2</sup>             |
| ACS Appl. Energy Mater. 2020, 3, 11893–11899 | 1211 (0.2 C)                     | 967 (0.3 C); 908 (0.5 C); 734 (1 C); 545 (2 C)          | 400                | ~0.109%                    | 100%                 | 72.8 wt%                            |



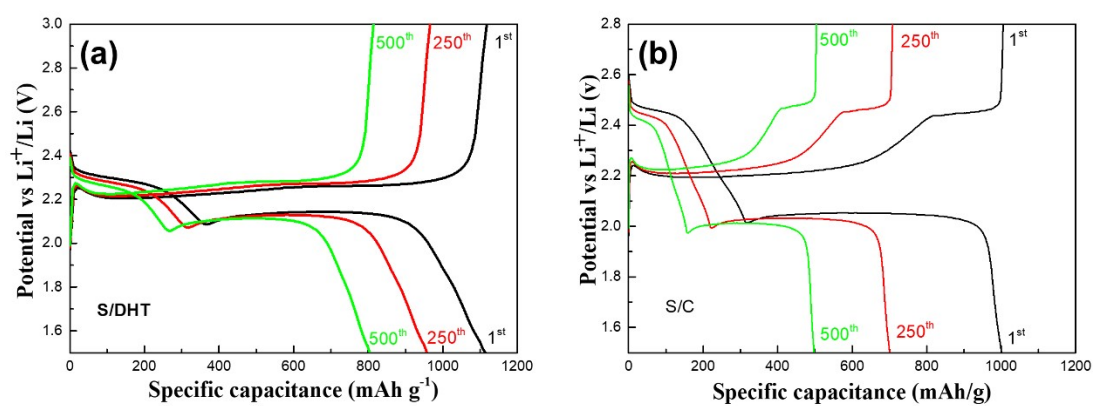

**Figure S13.** The different cycles (1<sup>st</sup>, 250<sup>th</sup>, 500<sup>th</sup>) discharge-charge curves of Li-S batteries with (a) S/DHT cathode, (b) S/C cathode at 0.1 C at the sulfur loading of 3.8 mg cm<sup>-2</sup>.

## References

1. S. B. Zeng, L. G. Li, L. H. Xie, D. K. Zhao, N. Zhou, N. Wang, S. W. Chen., *Carbon*, **2017**, 122, 106-113.
